# Supplementary material for: Extensive culturomics of 8 healthy samples enhances metagenomics efficiency
Source: PubMed Central journal article supplement (PMC6802823; doi:10.1371/journal.pone.0223543), 2019-10-21
Supplement: pone.0223543.s005.pdf [file pone.0223543.s005.pdf]

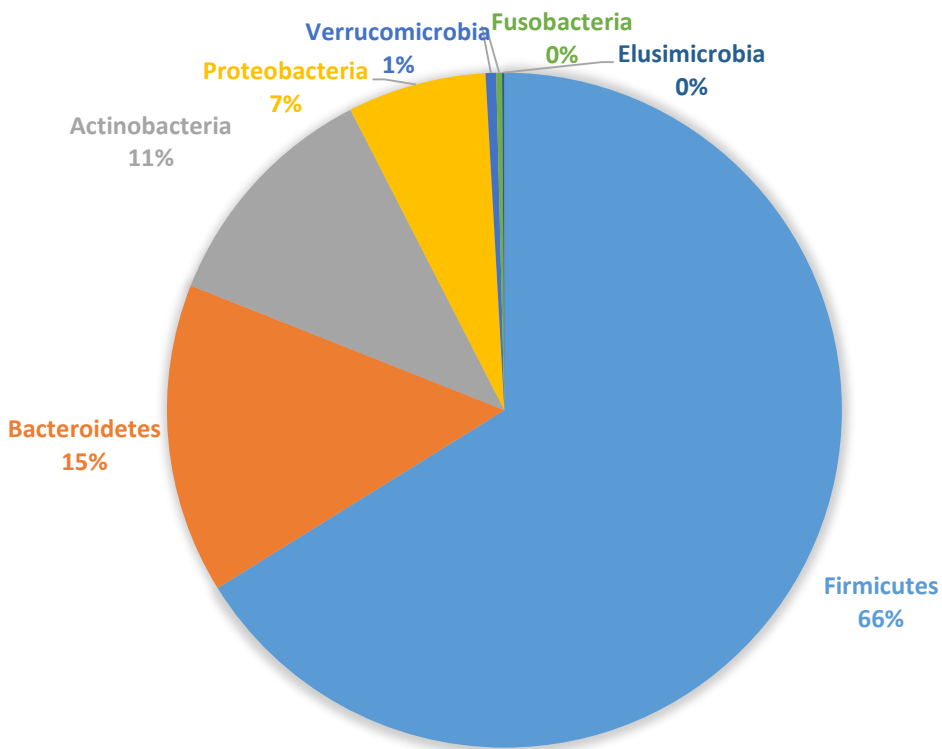

**A. Distribution of bacterial species into 7 main phylum in metagenomics**

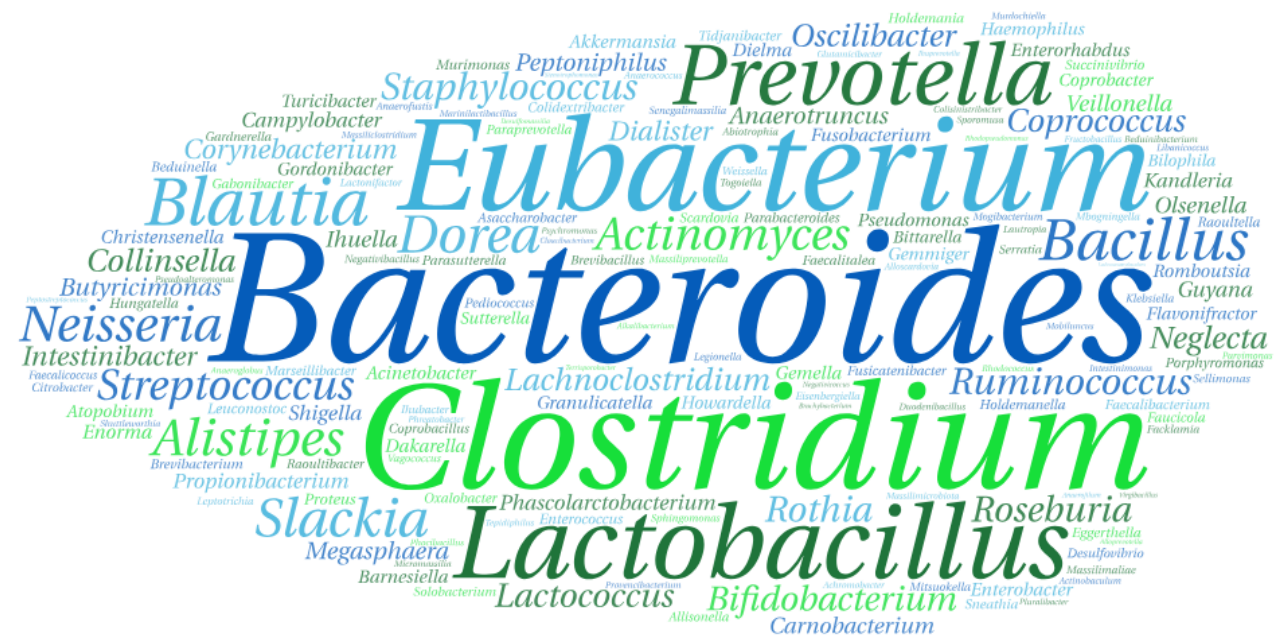

**B. Distribution of bacterial species into 196 genera in metagenomics.** This figure is generated thanks to the WordArt online tool ([wordart.com](http://wordart.com)). The size of the denomination of each genus is proportional to its frequency in this study.
