# Supplementary material for: Extensive culturomics of 8 healthy samples enhances metagenomics efficiency
Source: PLoS One. 2019 Oct 21;14(10):e0223543. doi: 10.1371/journal.pone.0223543 (PMC6802823; doi:10.1371/journal.pone.0223543)
Supplement: S1 Table — (XLSX) [file pone.0223543.s001.xlsx]

## Sheet: Feuil1
18 culturomics standard conditions
1- Preincubation of stool preparation in anaerobic blood culture bottle (Hemoc Ana 37°C)
2- Preincubation of stool preparation in aerobic blood culture bottle with 5ml of rumen fluid (HR Ae 37°C)
3- Preincubation of stool preparation in anaerobic blood culture bottle with 5ml of rumen fluid (HR Ana 37°C)
4- Preincubation of stool preparation in aerobic blood culture bottle with 5ml of sheep blood (HS Ae 37°C)
5- Preincubation of stool preparation in anaerobic blood culture bottle with 5ml of sheep blood (HS Ana 37° C)
6- Preincubation of stool preparation in aerobic blood culture bottle with 5ml of rumen fluid and 5ml of sheep blood (HRS Ae 37°C)
7- Preincubation of stool preparation in anaerobic blood culture bottle with 5ml of rumen fluid and 5ml of sheep blood (HRS Ana 37°C)
8- Preincubation of stool preparation filtered at 5µm in aerobic blood culture bottle (5µm Ae 37°C)
9- Preincubation of stool preparation filtered at 5µm in anaerobic blood culture bottle (5µm Ana 37°C)
10- Preincubation of stool preparation after thermic shock at 80°C during 20min in anaerobic blood culture bottle (TS Ana 37°C)
11- Preincubation of stool preparation in COS liquid medium with 5% sheep blood in aerobic condition (Cos Ae 37°C)
12- Preincubation of stool preparation in COS liquid medium with 5% sheep blood in anaerobic condition (Cos Ana 37°C)
13- Preincubation of stool preparation in COS liquid medium with 5% sheep blood in aerobic condition (Cos Ae 28°C)
14- Preincubation of stool preparation in COS liquid medium with 5% sheep blood in anaerobic condition (Cos Ana 28°C)
15- Preincubation of stool preparation in Marine broth in aerobic condition (Marin Ae 37°C)
16- Preincubation of stool preparation in Marine broth in anaerobic condition (Marin Ana 37°C)
17- Preincubation of stool preparation in Trypticase Soy Broth medium in aerobic condition (TSB Ae 37°C)
18- Preincubation of stool preparation in Brain Heart Infusion broth with 5% sheep blood in aerobic condition (BHI+ Sg Ae 37°C)
18 New culture media introduced
1- Preincubation of stool preparation in YCFA medium in anaerobic condition (YCFA Ana 37°C)
2- Preincubation of stool preparation in Christensenella medium in anaerobic condition (Christensenella Ana 37°C)
3- Preincubation of stool preparation in MRS medium in anaerobic condition (MRS Ana 37°C)
4- Preincubation of stool preparation in Schaedler medium in anaerobic condition (Schaedler Ana 37°C)
5- Preincubation of stool preparation in R-medium and lamb serum with 5ml of rumen fluid and 5ml of sheep blood in anaerobic condition (R-medium+SA+RS Ana 37°C)
6- Preincubation of stool preparation in R-medium with 5ml of rumen fluid and 5ml of sheep blood in anaerobic condition (R-medium+RS Ana 37°C)
7- Preincubation of stool preparation filtered at 0,45µm in aerobic blood culture (0,45µm Ae 37°C)
8- Preincubation of stool preparation filtered at 0,45µm in anaerobic blood culture bottle (0,45µm Ana 37°C)
9- Preincubation of stool preparation in Trypticase Soy Broth medium in anaerobic condition (TSB Ana 37°C)
10- Direct culture of stool preparation in CNA Agar medium in anaerobic condition (CNA Agar Ana 37°C)
11- Direct culture of stool preparation in R-medium Agar in anaerobic condition (R-medium Agar Ana 37°C)
12- Direct culture of stool preparation in Schaedler Agar medium in anaerobic condition (Schaedler Agar Ana 37°C)
13- Direct culture of stool preparation in YCFA Agar medium in anaerobic condition (YCFA Agar Ana 37°C)
14- Direct culture of stool preparation in Reinforced clostridial Agar medium in anaerobic (RCM Agar Ana 37°C)
15- Direct culture of stool preparation in Wilkins chalgren Agar medium in anaerobic condition (Wilkins chalgren Agar Ana 37°C)
16- Direct culture of stool preparation in Brain-heart infusion Agar medium in anaerobic condition (BHI Agar Ana 37°C)
17- Direct culture of stool preparation in Columbia Blood Agar medium in anaerobic condition (Colombia Agar Ana 37°C)
18- Direct culture of stool preparation in MRS Agar medium in anaerobic condition (MRS Agar Ana 37°C)
22 Alcohol condition
1- Preincubation of stool preparation in aerobic blood culture bottle with 5ml of rumen fluid (HR alcohol Ae 37°C)
2- Preincubation of stool preparation in anaerobic blood culture bottle with 5ml of rumen fluid (HR alcohol Ana 37°C)
3- Preincubation of stool preparation in aerobic blood culture bottle with 5ml of sheep blood (HS alcohol Ae 37°C)
4- Preincubation of stool preparation in anaerobic blood culture bottle with 5ml of sheep blood (HS alcohol Ana 37° C)
5- Preincubation of stool preparation in aerobic blood culture bottle with 5ml of sheep blood (HS alcohol Ae 28°C)
6- Preincubation of stool preparation in anaerobic blood culture bottle with 5ml of sheep blood (HS alcohol Ana 28° C)
7- Preincubation of stool preparation in aerobic blood culture bottle with 5ml of rumen fluid and 5ml of sheep blood (HRS alcohol Ae 37°C)
8- Preincubation of stool preparation in anaerobic blood culture bottle with 5ml of rumen fluid and 5ml of sheep blood (HRS alcohol Ana 37°C)
9- Preincubation of stool preparation in aerobic blood culture bottle with 5ml of rumen fluid and 5ml of sheep blood (HRS alcohol Ae 28°C)
10- Preincubation of stool preparation in anaerobic blood culture bottle with 5ml of rumen fluid and 5ml of sheep blood (HRS alcohol Ana 28°C)
11- Preincubation of stool preparation in COS liquid medium with 5% sheep blood in aerobic condition (Cos alcohol Ae 37°C)
12- Preincubation of stool preparation in COS liquid medium with 5% sheep blood in anaerobic condition (Cos alcohol Ana 37°C)
13- Preincubation of stool preparation in Marine broth in aerobic condition (Marin alcohol Ae 37°C)
14- Preincubation of stool preparation in Marine broth in anaerobic condition (Marin alcohol Ana 37°C)
15- Preincubation of stool preparation in Trypticase Soy Broth medium in aerobic condition (TSB alcohol Ae 37°C)
16- Preincubation of stool preparation in Trypticase Soy Broth medium in anaerobic condition (TSB alcohol Ana 37°C)
17- Direct culture of stool preparation in YCFA Agar medium in anaerobic condition (YCFA alcohol Agar Ana 37°C)
18- Direct culture of stool preparation in Reinforced clostridial Agar medium in anaerobic (RCM alcohol Agar Ana 37°C)
19- Direct culture of stool preparation in Wilkins chalgren Agar medium in anaerobic condition (Wilkins chalgren alcohol Agar Ana 37°C)
20- Direct culture of stool preparation in Brain-heart infusion Agar medium in anaerobic condition (BHI alcohol Agar Ana 37°C)
21- Direct culture of stool preparation in Columbia Blood Agar medium in anaerobic condition (Colombia alcohol Agar Ana 37°C)
22- Direct culture of stool preparation in MRS Agar medium in anaerobic condition (MRS alcohol Agar Ana 37°C)
S1 Table: List of culture condition
